# Supplementary material for: Pediatric BMI changes during COVID-19 pandemic: An electronic health record-based retrospective cohort study
Source: PubMed Central journal article supplement — eClinicalMedicine. 2021 Jul 16;38:101026. doi: 10.1016/j.eclinm.2021.101026 (PMC8318998; doi:10.1016/j.eclinm.2021.101026), 2021-07-16
Supplement: mmc1.pdf [file mmc1.pdf]

## Supplementary material

**Supplementary Figure 1: Attrition**

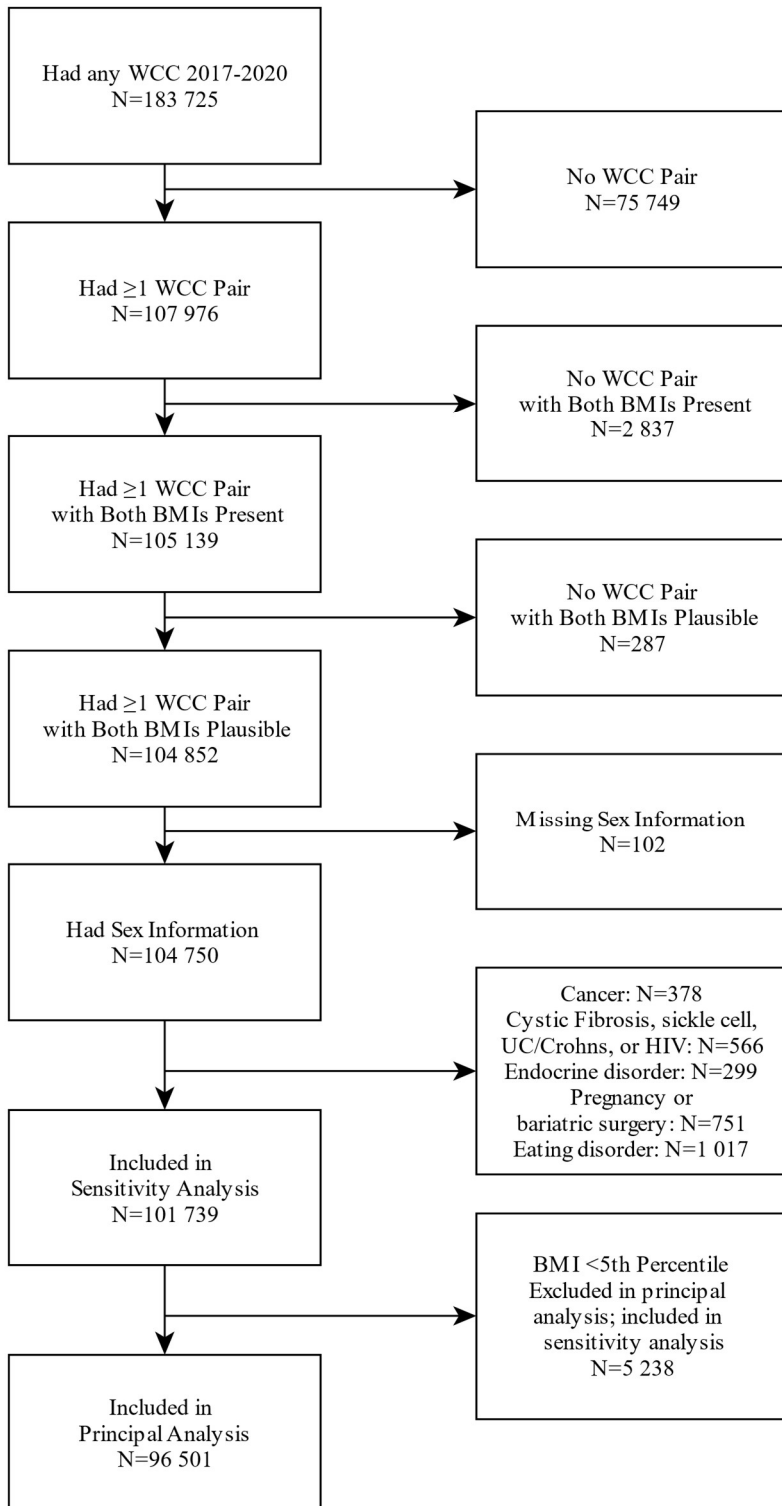

*Counts of unique patients;  
A patient may have contributed more than one WCC pair to the study*

### Supplementary Table 1

Bias Analysis: Patients who were vs were not selected into OPTUM COVID data

| Patient Group                        | Age-and-Sex Adjusted BMI Gain Since Previous WCC |             |                             |                             |                         |             |                             |                             |
|--------------------------------------|--------------------------------------------------|-------------|-----------------------------|-----------------------------|-------------------------|-------------|-----------------------------|-----------------------------|
|                                      | Qualifying WCC Sep 2019                          |             |                             |                             | Qualifying WCC Sep 2020 |             |                             |                             |
|                                      | N                                                | Mean (SD)   | 50 <sup>th</sup> percentile | 90 <sup>th</sup> percentile | N                       | Mean (SD)   | 50 <sup>th</sup> percentile | 90 <sup>th</sup> percentile |
| Patient in Non-COVID OPTUM Data Only | 39 695                                           | 0.34 (1.50) | 0.22                        | 2.07                        | 34 173                  | 0.57 (1.67) | 0.39                        | 2.58                        |
| Patient in OPTUM COVID Data          | 5 215                                            | 0.37 (1.53) | 0.27                        | 2.14                        | 5 011                   | 0.61 (1.72) | 0.42                        | 2.75                        |

### Supplementary Table 2

Bias Analysis: Patients who did not attend WCC, or had missing BMI, vs those who attended WCC in September-December of 2020

| Patient Group                                     | Age-and-Sex Adjusted BMI Gain Since Previous WCC |             |                             |                             |              |             |                             |                             |
|---------------------------------------------------|--------------------------------------------------|-------------|-----------------------------|-----------------------------|--------------|-------------|-----------------------------|-----------------------------|
|                                                   | Sep-Dec 2019                                     |             |                             |                             | Sep-Dec 2020 |             |                             |                             |
|                                                   | N                                                | Mean (SD)   | 50 <sup>th</sup> percentile | 90 <sup>th</sup> percentile | N            | Mean (SD)   | 50 <sup>th</sup> percentile | 90 <sup>th</sup> percentile |
| Patient has No WCC Pair in Late 2019              | ..                                               | ..          | ..                          | ..                          | 8 516        | 0.66 (1.77) | 0.46                        | 2.87                        |
| Patient has No WCC Pair in Late 2020              | 8 142                                            | 0.28 (1.65) | 0.19                        | 2.16                        | ..           | ..          | ..                          | ..                          |
| Patient has WCC Pair but Missing BMI in Late 2020 | 1 835                                            | 0.30 (1.46) | 0.18                        | 2.02                        | ..           | ..          | ..                          | ..                          |
| Patient has WCC Pairs in Late 2019 and Late 2020  | 8 649                                            | 0.32 (1.37) | 0.21                        | 1.95                        | 8 649        | 0.58 (1.68) | 0.41                        | 2.70                        |
